# Supplementary material for: Prevalence of Eating Disorders and Disordered Eating Behaviours amongst Adolescents and Young Adults in Saudi Arabia: A Systematic Review
Source: MDPI journal article supplement (doi:10.3390/nu15214643), 2023-11-01
Supplement: s1 [file s1]

| No. | Authors & Year                                                                                                                                                                                                                                                                                                                                                                                                                                                                                                                                                                                                    | JBI quality assessment criteria's |    |    |    |    |    |    |    | Quality Assessment Score |
|-----|-------------------------------------------------------------------------------------------------------------------------------------------------------------------------------------------------------------------------------------------------------------------------------------------------------------------------------------------------------------------------------------------------------------------------------------------------------------------------------------------------------------------------------------------------------------------------------------------------------------------|-----------------------------------|----|----|----|----|----|----|----|--------------------------|
|     |                                                                                                                                                                                                                                                                                                                                                                                                                                                                                                                                                                                                                   | Q1                                | Q2 | Q3 | Q4 | Q5 | Q6 | Q7 | Q8 |                          |
| #1  | AlHazmi & AlJohani (2019)                                                                                                                                                                                                                                                                                                                                                                                                                                                                                                                                                                                         | N                                 | Y  | Y  | Y  | NA | NA | Y  | Y  | 5                        |
| #2  | Albrahim et al (2019)                                                                                                                                                                                                                                                                                                                                                                                                                                                                                                                                                                                             | Y                                 | Y  | Y  | Y  | NA | NA | Y  | Y  | 6                        |
| #3  | Alwosaifer et al (2018)                                                                                                                                                                                                                                                                                                                                                                                                                                                                                                                                                                                           | Y                                 | Y  | Y  | Y  | NA | NA | Y  | Y  | 6                        |
| #4  | Tomar & Antony (2021)                                                                                                                                                                                                                                                                                                                                                                                                                                                                                                                                                                                             | Y                                 | Y  | Y  | Y  | NA | NA | Y  | Y  | 6                        |
| #5  | Al-Qahtani & Al-Harbi (2020)                                                                                                                                                                                                                                                                                                                                                                                                                                                                                                                                                                                      | Y                                 | Y  | Y  | Y  | NA | NA | Y  | Y  | 6                        |
| #6  | Al-Subaie (2000)                                                                                                                                                                                                                                                                                                                                                                                                                                                                                                                                                                                                  | Y                                 | U  | Y  | Y  | NA | NA | Y  | Y  | 5                        |
| #7  | Almuhlaifi et al (2018)                                                                                                                                                                                                                                                                                                                                                                                                                                                                                                                                                                                           | N                                 | Y  | Y  | Y  | NA | NA | Y  | Y  | 5                        |
| #8  | Alsubaie et al (2019)                                                                                                                                                                                                                                                                                                                                                                                                                                                                                                                                                                                             | N                                 | Y  | Y  | Y  | NA | NA | Y  | Y  | 5                        |
| #9  | Fatima & Ahmed (2018)                                                                                                                                                                                                                                                                                                                                                                                                                                                                                                                                                                                             | Y                                 | Y  | Y  | Y  | NA | NA | Y  | Y  | 6                        |
| #10 | Ghafouri et al (2021)                                                                                                                                                                                                                                                                                                                                                                                                                                                                                                                                                                                             | Y                                 | Y  | Y  | Y  | NA | NA | Y  | Y  | 6                        |
| #11 | Allihaibi (2015)                                                                                                                                                                                                                                                                                                                                                                                                                                                                                                                                                                                                  | N                                 | Y  | Y  | U  | NA | NA | Y  | Y  | 4                        |
| #12 | Fallatah et al (2015)                                                                                                                                                                                                                                                                                                                                                                                                                                                                                                                                                                                             | Y                                 | Y  | Y  | Y  | NA | NA | Y  | Y  | 6                        |
| #13 | Loni et al (2022)                                                                                                                                                                                                                                                                                                                                                                                                                                                                                                                                                                                                 | Y                                 | Y  | Y  | Y  | NA | NA | Y  | Y  | 6                        |
| #14 | ElShikieri (2022)                                                                                                                                                                                                                                                                                                                                                                                                                                                                                                                                                                                                 | Y                                 | Y  | Y  | Y  | NA | NA | Y  | Y  | 6                        |
|     | <p>Note: Y - Yes, N - No, U – Unclear, NA-Not applicable</p> <p>Q1= Were the criteria for inclusion in the sample clearly defined?</p> <p>Q2= Were the study subjects and the setting described in detail?</p> <p>Q3= Was the exposure measured in a valid and reliable way?</p> <p>Q4= Were objective, standard criteria used for measurement of the condition?</p> <p>Q5= Were confounding factors identified?</p> <p>Q6= Were strategies to deal with confounding factors stated?</p> <p>Q7= Were the outcomes measured in a valid and reliable way?</p> <p>Q8= Was appropriate statistical analysis used?</p> |                                   |    |    |    |    |    |    |    |                          |

**Supplementary Material. S2 JBI Quality Assessment Tool for the Quality Appraisal of the Selected Records**
